# Supplementary material
Source: Springer Nature journal article supplement (https://www.springermedizin.de/resource/supplementary/12865_2013_547_MOESM5_ESM.pdf/9428190)

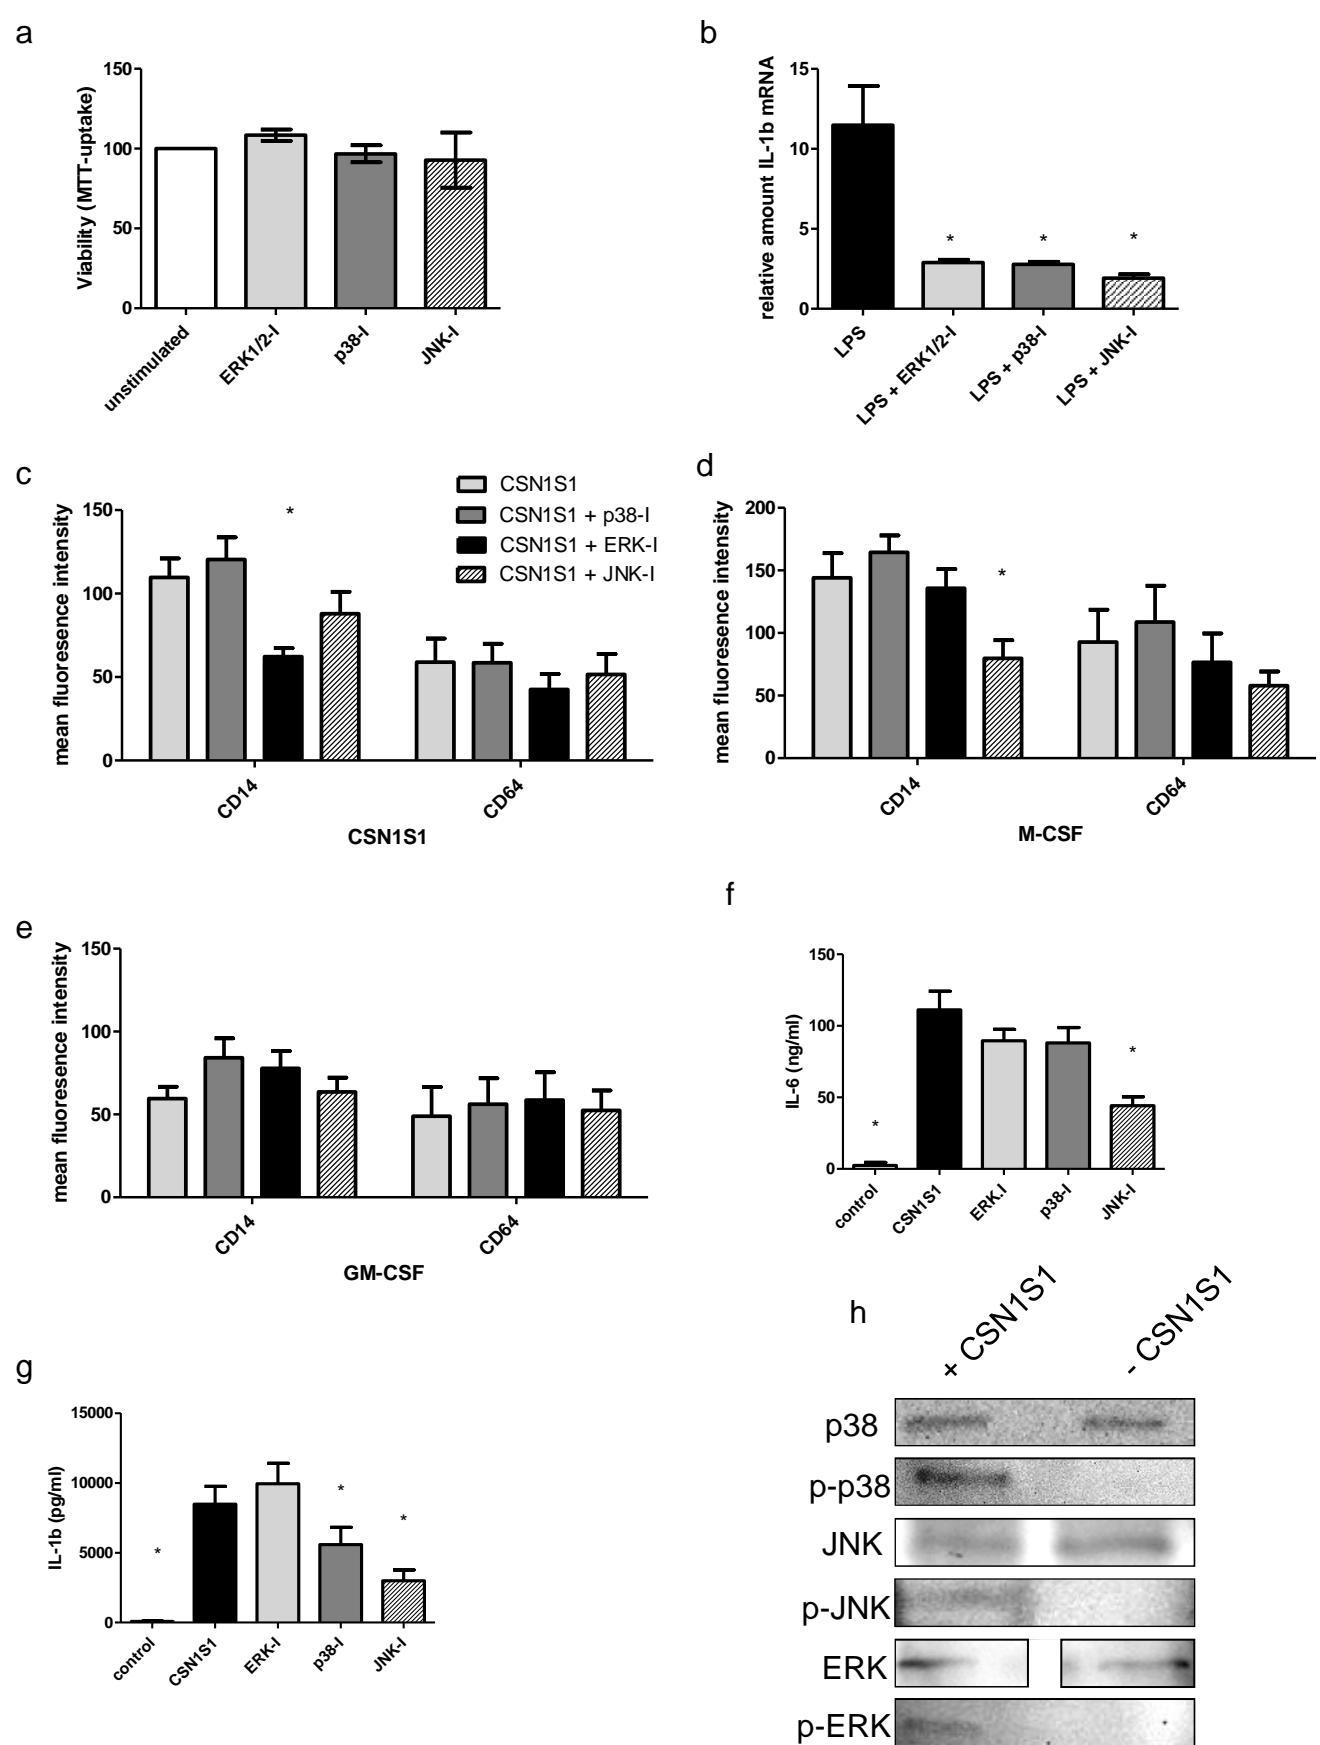

Supplement: MOESM5 [file 9428190]
